# Supplementary material
Source: publisher figshare collection journal article supplement (https://springernature.figshare.com/ndownloader/files/20775264)

Additional files 2: Figure S2

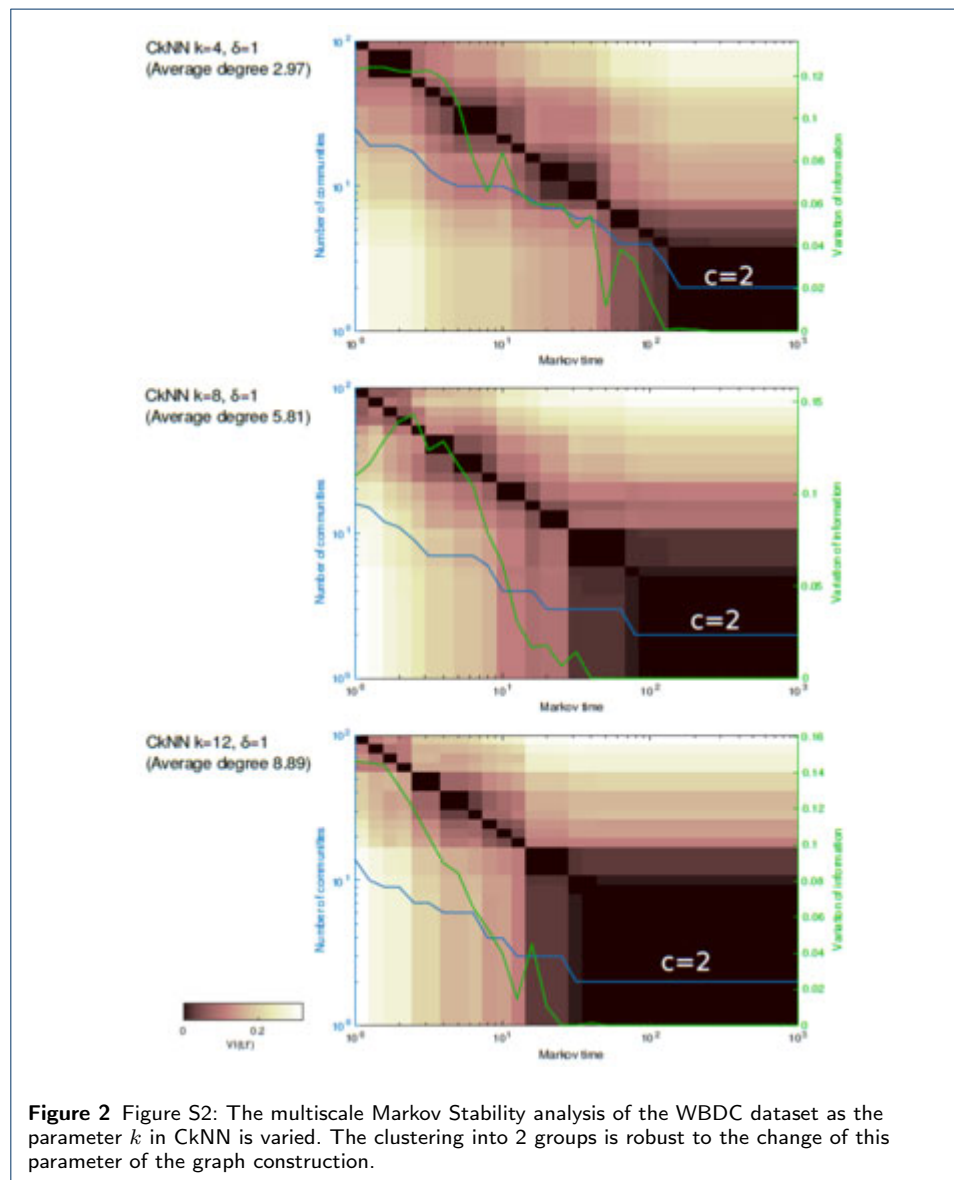

Supplement: Supplementary file 1 [file 20775264]
